# Supplementary material for: Perovskite-structured CaTiO3 coupled with g-C3N4 as a heterojunction photocatalyst for organic pollutant degradation
Source: publisher site journal article supplement (doi:10.3762/bjnano.9.62), 2018-02-21
Supplement: Additional file 1 [file 2190-4286-9-62-S1.pdf]

# **Perovskite-structured $\text{CaTiO}_3$ coupled with $\text{g-C}_3\text{N}_4$ as a heterojunction photocatalyst for organic pollutant degradation**

Ashish Kumar, Christian Schuerings, Suneel Kumar, Ajay Kumar and Venkata Krishnan\*

Address: School of Basic Sciences and Advanced Materials Research Center, Indian Institute of Technology Mandi, Kamand, Mandi 175005, Himachal Pradesh, India

Email: Venkata Krishnan - [ykn@iitmandi.ac.in](mailto:ykn@iitmandi.ac.in)

\*Corresponding author

## Additional experimental results

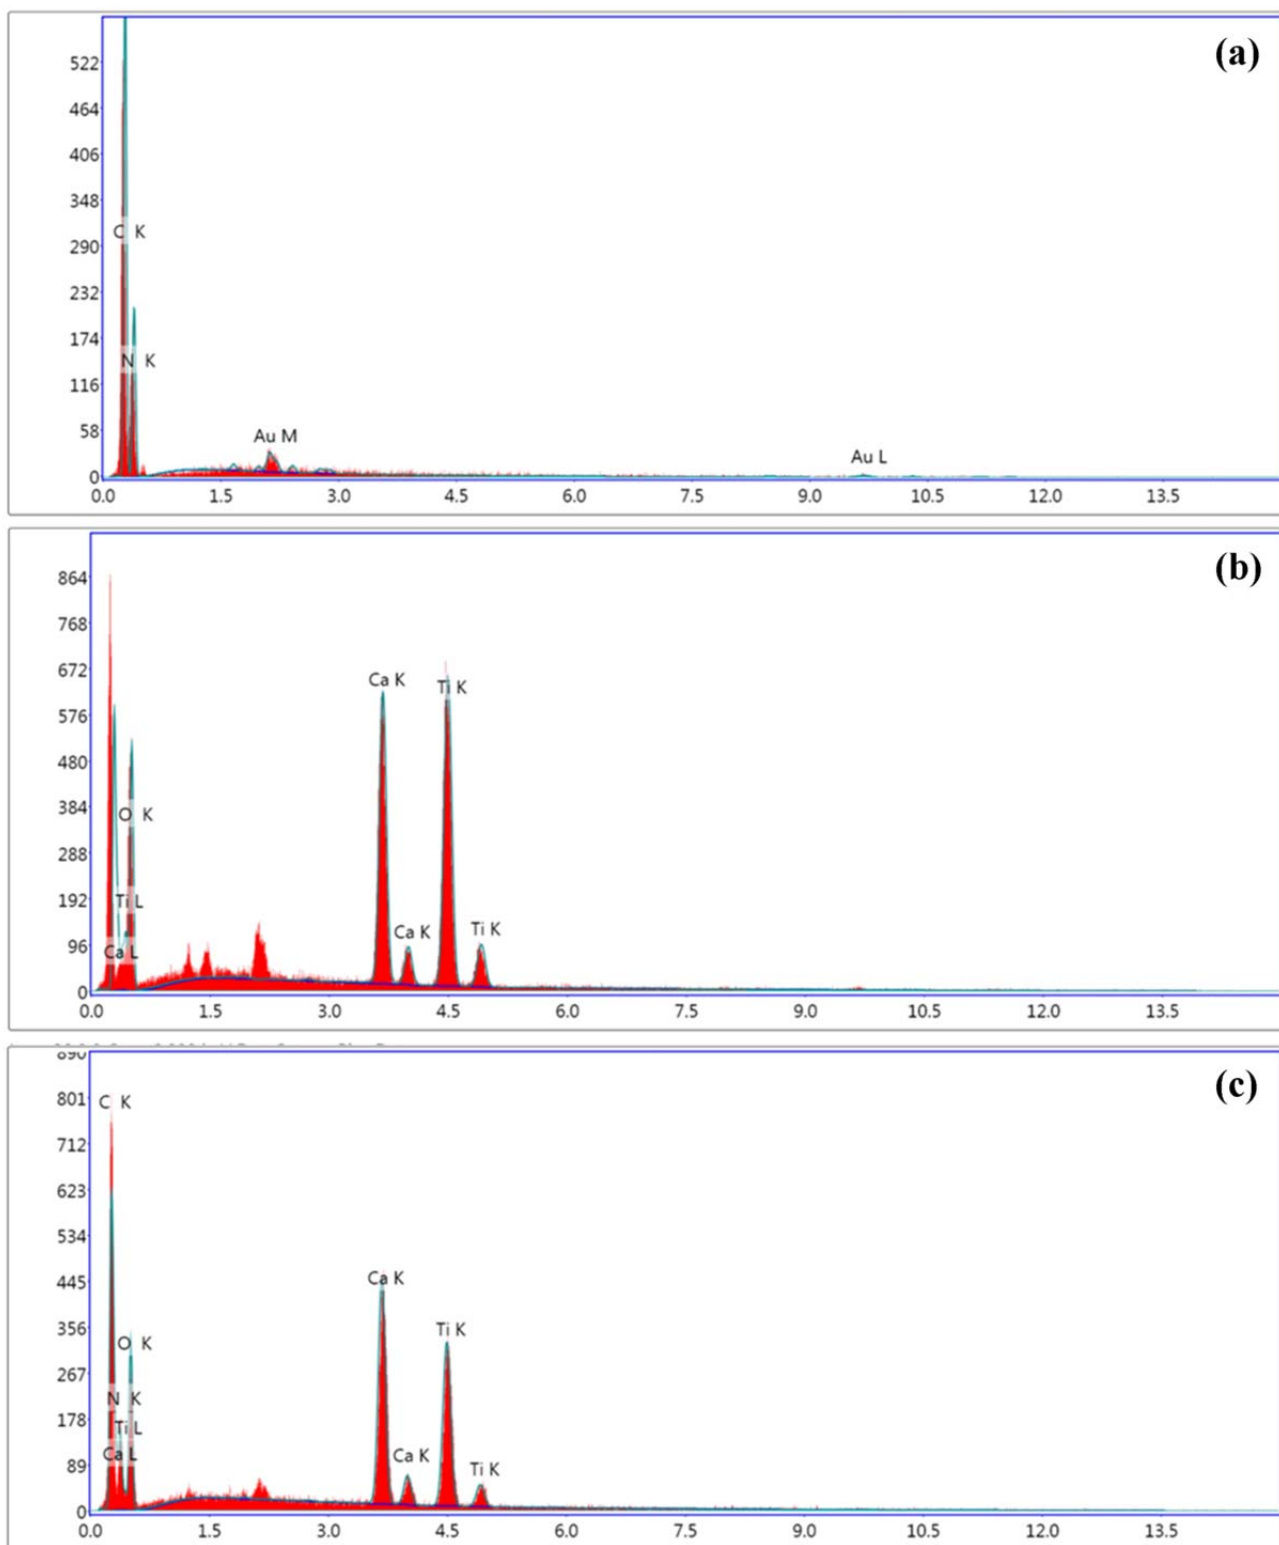

**Figure S1.** EDAX spectra of (a) g-C<sub>3</sub>N<sub>4</sub>, (b) CT and (c) CTCN heterojunction.

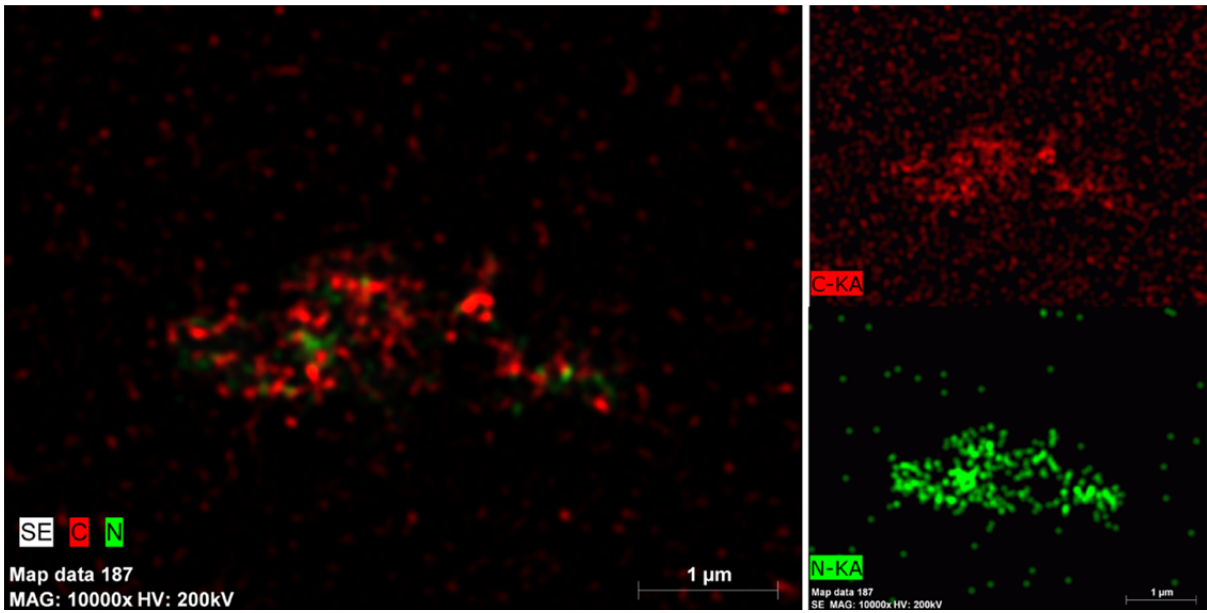

**Figure S2.** Elemental mapping of  $g\text{-C}_3\text{N}_4$  sheets.

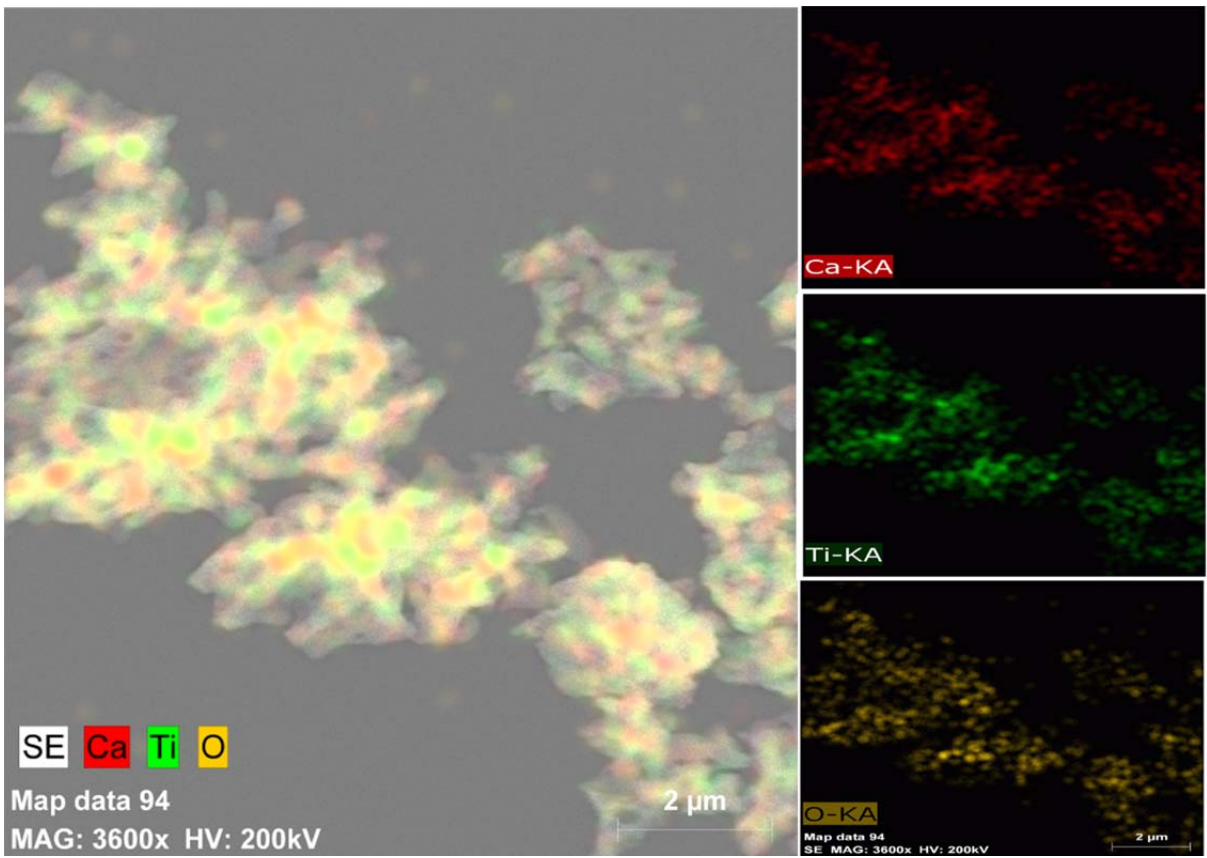

**Figure S3.** Elemental mapping of CT nanoflakes.

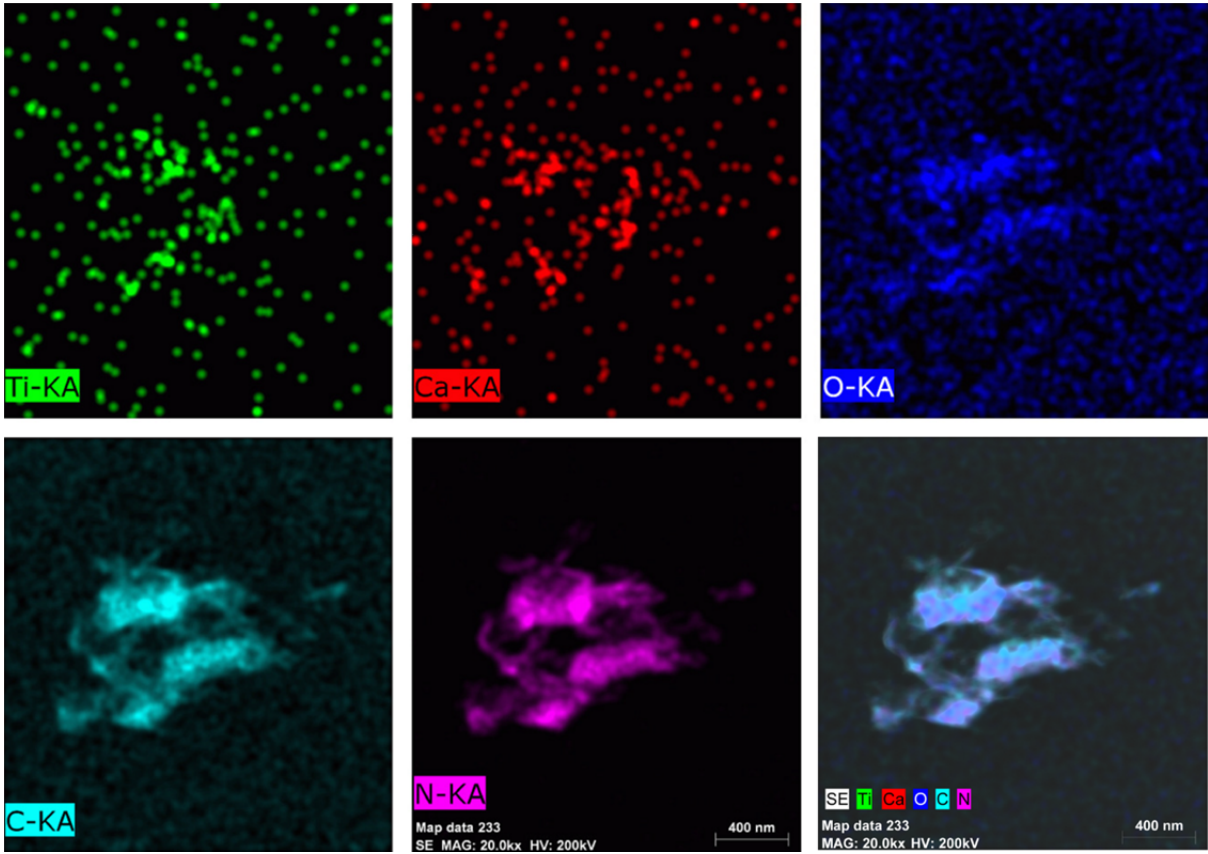

Figure S4. Elemental mapping of CTCN heterojunction.

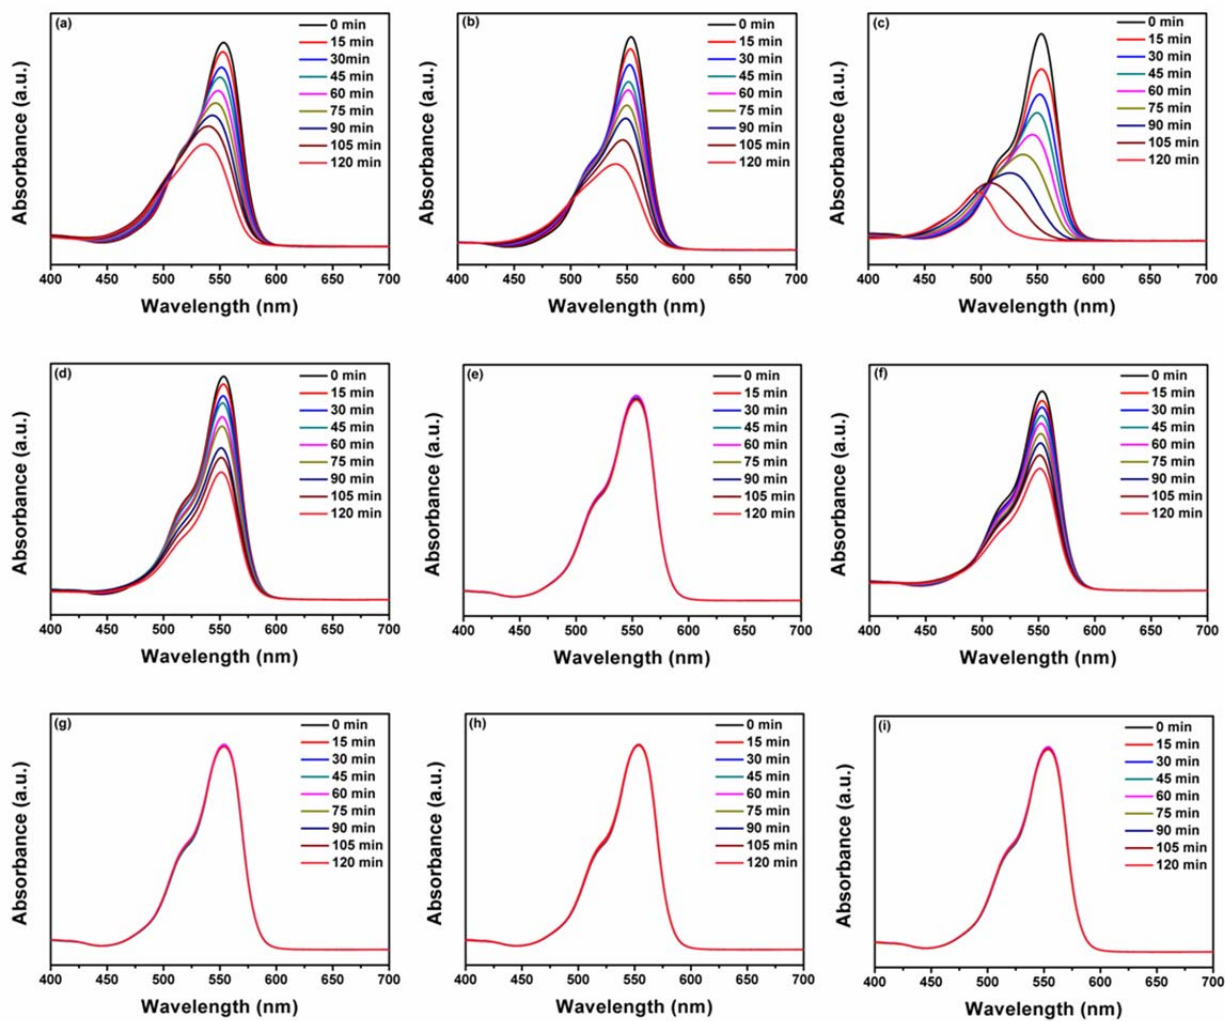

**Figure S5.** Time-dependent absorption spectra of RhB degradation over (a, b, c)  $g\text{-C}_3\text{N}_4$ , (d, e, f) CT and (g, h, i) pure RhB (without catalyst) under UV, visible and sunlight irradiations, respectively.

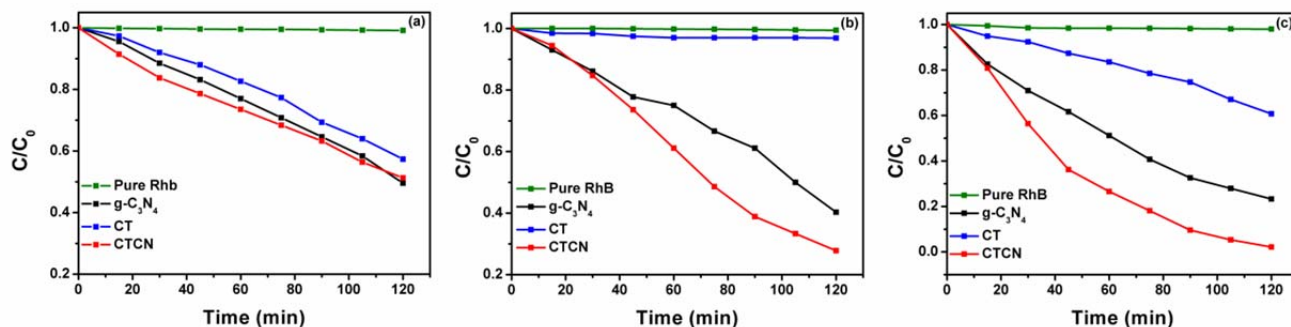

**Figure S6.**  $C/C_0$  vs time plots for the photocatalytic degradation of RhB under UV, visible and sunlight irradiation.

**Table S1.** Summary of kinetic data obtained by applying pseudo first order kinetic model for the photocatalytic degradation of RhB using as prepared photocatalysts under different light irradiations.

| Under UV light irradiation      |                       |       |
|---------------------------------|-----------------------|-------|
| Composite                       | Rate constant $k$     | $R^2$ |
| $g-C_3N_4$                      | $5.6 \times 10^{-3}$  | 0.97  |
| CT                              | $4.6 \times 10^{-3}$  | 0.97  |
| CTCN                            | $5.4 \times 10^{-3}$  | 0.99  |
| Under visible light irradiation |                       |       |
| $g-C_3N_4$                      | $7.0 \times 10^{-3}$  | 0.94  |
| CT                              | $0.4 \times 10^{-3}$  | 0.98  |
| CTCN                            | $11.4 \times 10^{-3}$ | 0.98  |
| Under sunlight irradiation      |                       |       |
| $g-C_3N_4$                      | $12.3 \times 10^{-3}$ | 0.99  |
| CT                              | $4.0 \times 10^{-3}$  | 0.96  |
| CTCN                            | $30.9 \times 10^{-3}$ | 0.96  |

**Table S2.** Summary of kinetic data obtained by applying modified Freundlich model for the photocatalytic degradation of RhB using as prepared photocatalysts under different light irradiations.

| Under UV light irradiation      |                       |       |
|---------------------------------|-----------------------|-------|
| Composite                       | Rate constant $k$     | $R^2$ |
| g-C <sub>3</sub> N <sub>4</sub> | $2.2 \times 10^{-3}$  | 0.99  |
| CT                              | $1.4 \times 10^{-3}$  | 0.99  |
| CTCN                            | $9.4 \times 10^{-3}$  | 0.99  |
| Under visible light irradiation |                       |       |
| g-C <sub>3</sub> N <sub>4</sub> | $4.6 \times 10^{-3}$  | 0.99  |
| CT                              | $0.4 \times 10^{-3}$  | 0.97  |
| CTCN                            | $2.1 \times 10^{-3}$  | 0.99  |
| Under sunlight irradiation      |                       |       |
| g-C <sub>3</sub> N <sub>4</sub> | $24.1 \times 10^{-3}$ | 0.99  |
| CT                              | $1.3 \times 10^{-3}$  | 0.98  |
| CTCN                            | $29.2 \times 10^{-3}$ | 0.96  |

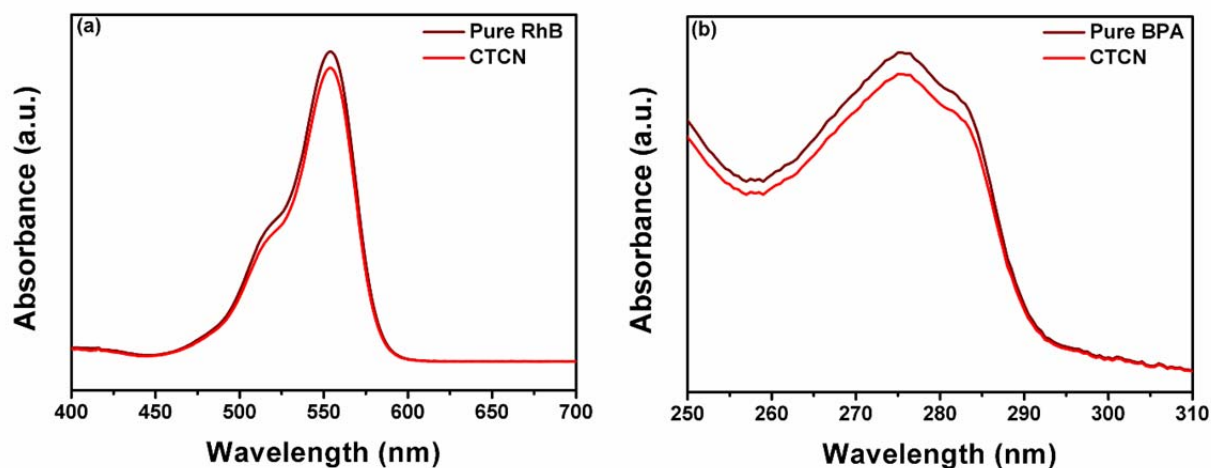

**Figure S7.** Absorption spectra for calculation of adsorption percentage of (a) RhB over CTCN and (b) BPA over CTCN heterojunction.
